# Supplementary material for: Ion induced ultra-tough single-network ionogel
Source: Royal Society of Chemistry journal article supplement (doi:10.1039/d4cc04732j), 2024-01-01
Supplement: d4cc04732j1.pdf [file d4cc04732j1.pdf]

## Supporting Information

# Ion Induced Ultratough Single-network Ionogel

*Zhenchuan Yu,<sup>\*a</sup> Biaolong Ma<sup>a</sup> and Jiqiang Wang<sup>a</sup>*

<sup>a</sup> State Key Laboratory of Bio-fibers and Eco-textiles, College of Materials Science and Engineering, Collaborative Innovation Center of Shandong Marine Biobased Fibers and Ecological Textiles, Institute of Marine Biobased Materials, Qingdao University, Qingdao 266071, China.

\*Corresponding author. E-mail: zhenchuanyu@qdu.edu.cn

## Experimental section

*Materials:* N,N-Dimethylacrylamide (DMAA), acrylic acid (AA), hydroxyethyl methacrylate (HEMA), 2-Hydroxy-4-(2-hydroxyethoxy)-2-methylpropiophenone (Irgacure 2959), 1-ethyl-3-methylimidazolium bis(trifluoromethylsulfonyl)imide (EMITFSI), 1-ethyl-3-methylimidazolium acetate (EMIAC), 1-ethyl-3-methylimidazolium methanesulfonate (EMIMeO<sub>3</sub>) and 1-ethyl-3-methylimidazolium ethyl sulfate (EMIES) were purchased from Sigma-Aldrich.

*Preparation of ionogel:* The ionogel was synthesized by one-step method using DMAA as monomer and EMITFSI and EMIAC as mixed solvent. In a typical procedure, DMAA with a prescribed concentration of 6 M was dissolved in the mixed solvent with a prescribed volume fraction of EMIAC ( $x=0.3$ ) to obtain a homogeneous solution. Then, the photoinitiator Irgacure 2959 (0.1 mol% relative to DMAA) was added. The obtained solution was poured into a mold containing two pieces of glass separated by a spacer and then irradiated under ultraviolet light for 2 h to obtain the ionogel. The other ionogels and hydrogels were fabricated in the same way.

*Characterization:* The transmittance of the ionogel was tested by UV-Vis-NIR spectrometer (UV-2600, Shimadzu) with the thickness of 1 mm. FTIR spectra were recorded on Nicolet iS50 (Thermo Fisher) using attenuated total reflectance (ATR) method. For the time-resolved FTIR spectra, the ATR crystal (diamond) was covered by the sample T/A-0 (about 500  $\mu\text{m}$ ), and a certain volume (200  $\mu\text{L}$  herein) of EMIAC was dropped onto the sample while starting the data acquisition. The spectra were collected at a resolution of 4  $\text{cm}^{-1}$  with 16 scans. Rheological characterizations of ionogels were performed on a HAAKE MARS modular advanced rheometer with a 25 mm parallel plate at angular frequency from 0.1 to 100 rad/s at 25 °C. Scanning electron microscopy (JSM-6390LV) was used to observe the microstructure of the samples. The universal mechanical test machine (Instron 5300) was used to characterized the tensile stress-strain curves of the ionogels. The stretching rate is 50 mm/min during the stretching process. Tensile toughness of the samples can be defined by integrating the area under the engineering stress-strain curves. To determine the fracture energy, two

sets of samples were prepared with the width was  $w_0 = 50$  mm and the thickness was  $t_0 = 1.5$  mm. One set of samples had no pre-crack, whereas the other set of samples were notched with a 25 mm-long single-edge. The uncut sample was stretched to measure the force-distance curve with the distance between the two clamps was 5 mm. When the two clamps were pulled to a distance of  $H$ , the area beneath the force-distance curve gives the work done by the applied force,  $U(H)$ . Also, the precut sample was stretched until the notch turns into a running crack. The critical distance  $H_c$  when the pre-notch starts propagating is recorded. Then the fracture energy of the ionogel can be evaluated by  $\Gamma = U(H_c)/w_0t_0$ .

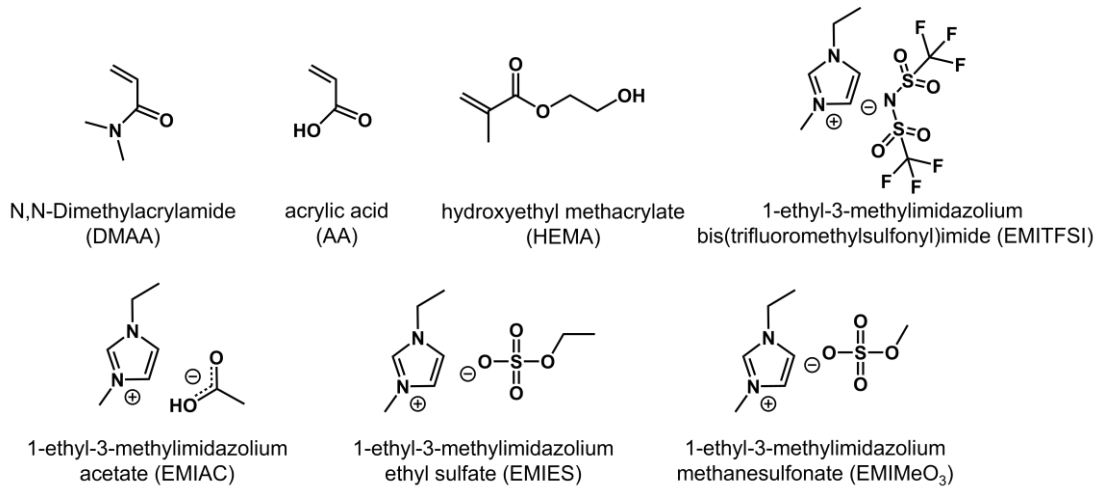

**Figure S1.** Chemical structures of materials used in this work.

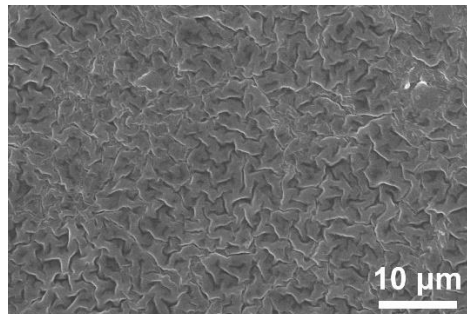

**Figure S2.** SEM image of T/A-0.4.

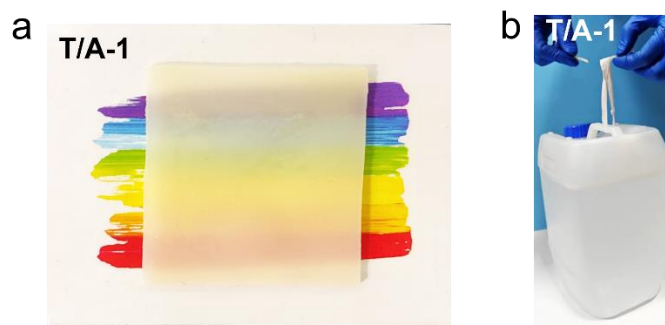

**Figure S3.** (a) The photograph of T/A-1. (b) The T/A-1 failed by brittle fracture without lifting the weight.

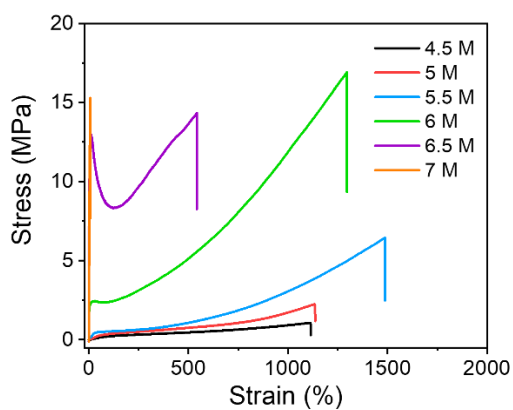

**Figure S4.** Stress-strain curves of T/A-0.3 with different monomer concentration.

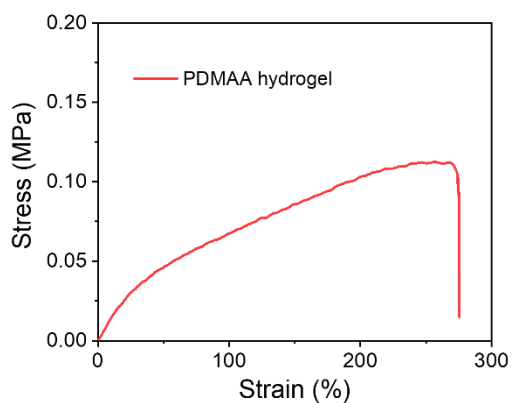

**Figure S5.** Stress-strain curves of PDMAA hydrogel.

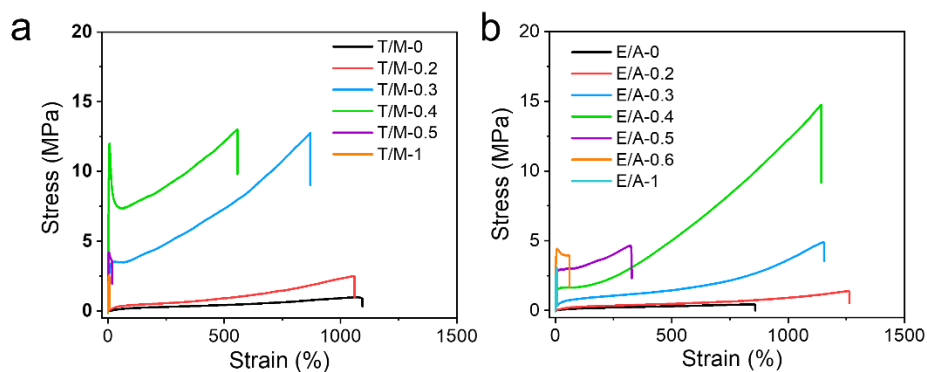

**Figure S6.** (a) Stress-strain curves of PDMAA ionogel with EMI as the cation, TFSI and methanesulfonate ( $\text{MeSO}_3$ ) as mixed anion. T refer to TFSI, M refer to  $\text{MeSO}_3$  and  $x$  refer to the volume fraction of  $\text{MeSO}_3$  in the mixed anion. (b) Stress-strain curves of PDMAA ionogel with EMI as the cation, ethyl sulfate (ES) and AC as mixed anion. E refer to ES, A refer to AC and  $x$  refer to the volume fraction of AC in the mixed anion.

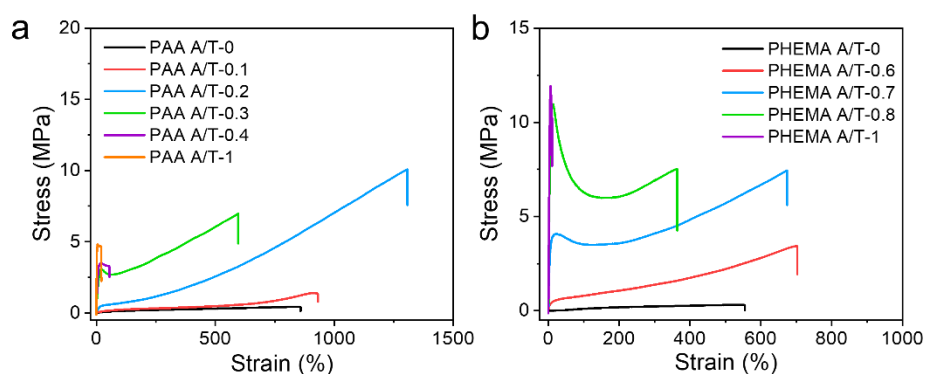

**Figure S7.** (a) Stress-strain curves of polyacrylic acid (PAA) ionogel with EMI as the cation, AC and TFSI as mixed anion. A refer to AC, T refer to TFSI, and  $x$  refer to the volume fraction of TFSI in the mixed anion. (b) Stress-strain curves of polyhydroxyethyl methacrylate (PHEMA) ionogels with EMI as the cation, AC and TFSI as mixed anion. A refer to AC, T refer to TFSI, and  $x$  refer to the volume fraction of TFSI in the mixed anion. EMIAC has good solubility for PAA and PHEMA, while EMITFSI has poor solubility for PAA and PHEMA

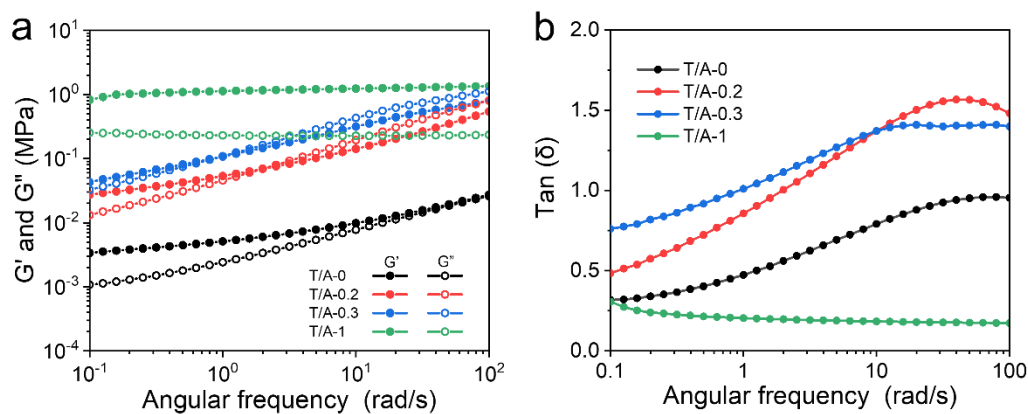

**Figure S8.** Angular frequency dependence of (a)  $G'$ ,  $G''$  and (b)  $\tan \delta$  for the samples T/A-0, T/A-0.2, T/A-0.3, and T/A-1.

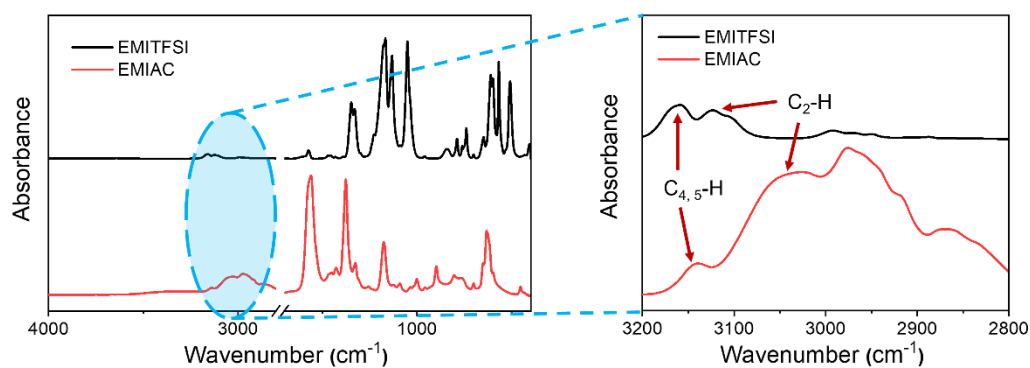

**Figure S9** FTIR spectra of EMITFSI and EMIAC.

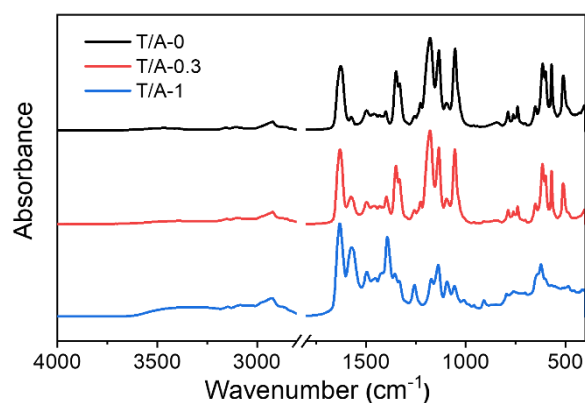

**Figure S10** FTIR spectra of the ionogel samples T/A-0, T/A-0.3 and T/A-1.
